# Supplementary material for: Multivariate Analysis among Marker Compounds, Environmental Factors, and Fruit Quality of Schisandra chinensis at Different Locations in South Korea
Source: MDPI journal article supplement (doi:10.3390/plants12223877), 2023-11-16
Supplement: s1 [file s1]

## SUPPLEMENTARY DATA

### Multivariate Analysis among Marker Compounds, Environmental Factors, and Fruit Quality of *Schisandra chinensis* at Different Locations in South Korea

Dong Hwan Lee <sup>1</sup>, Young-Ki Kim <sup>1</sup>, Yonghwan Son <sup>1</sup>, Gwang Hun Park <sup>1</sup>, Hae-Yun Kwon <sup>1</sup>, Youngki Park <sup>2</sup>,  
Eung-Jun Park <sup>2</sup>, Sun-Young Lee <sup>1</sup> and Hyun-Jun Kim <sup>1,\*</sup>

<sup>1</sup> Forest Medicinal Resources Research Center, National Institute of Forest Science,  
Yeongju-si 36040, Republic of Korea; leedh0419@korea.kr (D.H.L.); treeace@korea.kr (Y.-K.K.);  
thsdydghks@korea.kr (Y.S.); ppkh0230@korea.kr (G.H.P.); kwonhy05@korea.kr (H.-Y. K.);  
nararawood@korea.kr (S.-Y.L.)

<sup>2</sup> Department of Forest Bioresources, National Institute of Forest Science, Suwon 16631, Republic of Korea;  
woodpark@korea.kr (Y.P.); pahkej@korea.kr (E.-J.P.)

\* Correspondence: mind4938@korea.kr

**Table S1.** Meteorological data of 36 different *Schisandra chinensis* cultivation sites

| Cultivation Sites | AAT  | AAMT | AAmT | AMT  | AmT   | TP     | SSH    |
|-------------------|------|------|------|------|-------|--------|--------|
|                   | (°C) | (°C) | (°C) | (°C) | (°C)  | (mm)   | (h)    |
| 1                 | 13.3 | 19.3 | 8.3  | 36.2 | -9.5  | 2136.8 | 2161.2 |
| 2                 | 12.5 | 18.0 | 7.5  | 34.0 | -13.3 | 1694.4 | 2184.3 |
| 3                 | 12.5 | 18.0 | 7.5  | 34.0 | -13.3 | 1694.4 | 2184.3 |
| 4                 | 12.5 | 18.0 | 7.5  | 34.0 | -13.3 | 1694.4 | 2184.3 |
| 5                 | 11.0 | 17.1 | 5.3  | 33.9 | -20.3 | 1551.8 | 2152.3 |
| 6                 | 11.2 | 17.3 | 6.2  | 35.1 | -16.7 | 1429.1 | 1901.8 |
| 7                 | 11.2 | 17.3 | 6.0  | 33.2 | -13.1 | 2126.0 | 1988.7 |
| 8                 | 12.5 | 18.0 | 7.5  | 34.0 | -13.3 | 1694.4 | 2184.3 |
| 9                 | 12.5 | 18.0 | 7.5  | 34.0 | -13.3 | 1694.4 | 2184.3 |
| 10                | 13.9 | 19.9 | 8.7  | 36.9 | -10.5 | 1371.6 | 2368.8 |
| 11                | 11.2 | 17.3 | 6.0  | 33.2 | -13.1 | 2126.0 | 1988.7 |
| 12                | 11.2 | 17.3 | 6.0  | 33.2 | -13.1 | 2126.0 | 1988.7 |
| 13                | 12.6 | 18.0 | 8.0  | 34.9 | -10.5 | 1488.7 | 2385.3 |
| 14                | 12.2 | 18.0 | 7.1  | 36.4 | -17.2 | 1550.9 | 2284.5 |
| 15                | 12.5 | 18.0 | 7.5  | 34.0 | -13.3 | 1694.4 | 2184.3 |
| 16                | 12.1 | 18.1 | 6.8  | 34.5 | -17.0 | 1446.5 | 2222.0 |
| 17                | 12.8 | 17.9 | 8.2  | 34.5 | -14.6 | 1317.0 | 2279.5 |
| 18                | 11.5 | 18.5 | 5.7  | 36.4 | -16.3 | 1285.8 | 2190.8 |
| 19                | 11.2 | 17.3 | 6.0  | 33.2 | -13.1 | 2126.0 | 1988.7 |
| 20                | 12.2 | 18.0 | 7.0  | 34.1 | -16.0 | 1443.5 | 2185.3 |
| 21                | 11.2 | 17.3 | 6.2  | 35.1 | -16.7 | 1429.1 | 1901.8 |
| 22                | 13.1 | 19.1 | 8.1  | 34.7 | -12.3 | 2007.2 | 2162.1 |
| 23                | 12.5 | 18.7 | 7.2  | 34.4 | -15.4 | 1758.2 | 2062.0 |
| 24                | 9.6  | 15.0 | 4.9  | 34.9 | -17.1 | 1530.1 | 2022.1 |
| 25                | 11.2 | 17.3 | 6.0  | 33.2 | -13.1 | 2126.0 | 1988.7 |
| 26                | 13.0 | 19.7 | 7.5  | 36.3 | -10.4 | 1910.6 | 2176.8 |
| 27                | 12.8 | 18.0 | 8.0  | 34.7 | -12.6 | 1609.7 | 2356.9 |
| 28                | 13.9 | 18.9 | 9.7  | 36.0 | -13.7 | 1358.6 | 2319.9 |
| 29                | 13.9 | 19.6 | 9.0  | 35.1 | -10.1 | 1469.5 | 2254.7 |
| 30                | 10.8 | 16.9 | 5.3  | 32.8 | -17.7 | 1297.3 | 2076.4 |
| 31                | 13.1 | 18.8 | 8.2  | 35.0 | -13.0 | 1563.7 | 2271.9 |
| 32                | 12.0 | 17.6 | 6.7  | 33.5 | -14.3 | 1499.9 | 2211.4 |
| 33                | 12.9 | 18.0 | 8.5  | 34.9 | -12.6 | 1635.5 | 2444.2 |
| 34                | 12.5 | 18.0 | 7.5  | 34.0 | -13.3 | 1694.4 | 2184.3 |
| 35                | 12.3 | 19.5 | 6.1  | 35.9 | -15.9 | 1128.9 | 2174.3 |
| 36                | 11.0 | 17.4 | 6.0  | 36.0 | -17.8 | 1305.4 | 1928.5 |

**Table S2.** Pearson's correlation coefficient between growth characteristics and soil physico-chemical properties of *Schisandra chinensis*

|                  | Correlation coefficient ( <i>r</i> ) <sup>a</sup> |                   |                   |                    |                   |                   |                    |                     |                    |
|------------------|---------------------------------------------------|-------------------|-------------------|--------------------|-------------------|-------------------|--------------------|---------------------|--------------------|
|                  | NFB                                               | LB                | WB                | FWB                | LF                | WF                | FWF                | FW30F               | SG                 |
| pH               | -0.213*<br>(0.027)                                | -0.148<br>(0.125) | -0.093<br>(0.338) | -0.208*<br>(0.031) | 0.036<br>(0.713)  | 0.045<br>(0.642)  | -0.098<br>(0.311)  | -0.097<br>(0.318)   | -0.046<br>(0.638)  |
| EC               | 0.074<br>(0.449)                                  | 0.011<br>(0.911)  | -0.087<br>(0.369) | -0.006<br>(0.955)  | -0.069<br>(0.479) | -0.118<br>(0.223) | -0.110<br>(0.258)  | -0.090<br>(0.355)   | -0.241*<br>(0.012) |
| OM               | 0.287**<br>(0.003)                                | 0.120<br>(0.217)  | 0.137<br>(0.157)  | 0.100<br>(0.302)   | 0.107<br>(0.051)  | 0.017<br>(0.860)  | -0.141<br>(0.147)  | -0.167<br>(0.083)   | -0.067<br>(0.488)  |
| TN               | -0.032<br>(0.741)                                 | -0.011<br>(0.910) | -0.021<br>(0.831) | 0.001<br>(0.995)   | 0.051<br>(0.600)  | 0.029<br>(0.764)  | 0.053<br>(0.588)   | -0.065<br>(0.504)   | 0.004<br>(0.964)   |
| AP               | 0.033<br>(0.737)                                  | 0.003<br>(0.973)  | -0.054<br>(0.577) | 0.019<br>(0.842)   | -0.088<br>(0.364) | -0.136<br>(0.161) | -0.050<br>(0.610)  | -0.050<br>(0.607)   | -0.121<br>(0.213)  |
| K <sup>+</sup>   | 0.073<br>(0.453)                                  | 0.032<br>(0.741)  | -0.048<br>(0.623) | 0.039<br>(0.689)   | -0.079<br>(0.418) | -0.125<br>(0.199) | -0.043<br>(0.659)  | -0.060<br>(0.537)   | -0.083<br>(0.390)  |
| Ca <sup>2+</sup> | 0.183<br>(0.058)                                  | 0.077<br>(0.429)  | -0.002<br>(0.980) | 0.110<br>(0.257)   | 0.016<br>(0.867)  | -0.070<br>(0.471) | -0.008<br>(0.937)  | -0.045<br>(0.647)   | 0.129<br>(0.184)   |
| Mg <sup>2+</sup> | 0.063<br>(0.516)                                  | -0.013<br>(0.892) | -0.155<br>(0.108) | -0.084<br>(0.390)  | -0.093<br>(0.340) | -0.098<br>(0.312) | -0.197*<br>(0.041) | -0.258**<br>(0.007) | 0.166<br>(0.085)   |
| Na <sup>+</sup>  | 0.146<br>(0.130)                                  | 0.005<br>(0.955)  | -0.029<br>(0.769) | 0.025<br>(0.795)   | -0.030<br>(0.756) | -0.120<br>(0.215) | -0.127<br>(0.189)  | -0.147<br>(0.130)   | -0.071<br>(0.464)  |
| CEC              | 0.226*<br>(0.019)                                 | 0.017<br>(0.864)  | -0.023<br>(0.815) | 0.025<br>(0.799)   | -0.003<br>(0.979) | -0.104<br>(0.285) | -0.194*<br>(0.045) | -0.202*<br>(0.036)  | 0.091<br>(0.348)   |
| BS               | 0.083<br>(0.393)                                  | -0.034<br>(0.726) | 0.002<br>(0.987)  | -0.038<br>(0.696)  | -0.005<br>(0.958) | -0.072<br>(0.460) | -0.155<br>(0.108)  | -0.187<br>(0.053)   | 0.075<br>(0.440)   |
| Sand             | 0.210*<br>(0.029)                                 | 0.048<br>(0.622)  | -0.107<br>(0.272) | 0.017<br>(0.861)   | -0.045<br>(0.640) | -0.059<br>(0.542) | -0.147<br>(0.128)  | -0.158<br>(0.102)   | 0.029<br>(0.765)   |
| Silt             | -0.188<br>(0.051)                                 | 0.038<br>(0.693)  | 0.032<br>(0.743)  | -0.041<br>(0.673)  | 0.068<br>(0.482)  | 0.109<br>(0.259)  | 0.078<br>(0.425)   | 0.048<br>(0.621)    | -0.137<br>(0.156)  |
| Clay             | -0.086<br>(0.376)                                 | -0.140<br>(0.149) | 0.138<br>(0.155)  | 0.031<br>(0.749)   | -0.022<br>(0.819) | -0.059<br>(0.544) | 0.141<br>(0.147)   | 0.203*<br>(0.035)   | 0.153<br>(0.115)   |

<sup>a</sup> Correlation coefficient (*r*) written is significantly correlated between the variables compared. Positive values denote positive correlation and negative values denote negative correlation. Values in bracket means *p* value (\*\* *p* < 0.01, \* *p* < 0.05)

**Table S3.** Pearson's correlation coefficient between growth characteristics and meteorological properties of *Schisandra chinensis*

|      | Correlation coefficient ( <i>r</i> ) <sup>a</sup> |                   |                   |                   |                   |                   |                   |                   |                     |
|------|---------------------------------------------------|-------------------|-------------------|-------------------|-------------------|-------------------|-------------------|-------------------|---------------------|
|      | NFB                                               | LB                | WB                | FWB               | LF                | WF                | FWF               | FW30F             | SG                  |
| AAT  | -0.070<br>(0.472)                                 | -0.110<br>(0.256) | 0.064<br>(0.514)  | -0.017<br>(0.860) | -0.013<br>(0.896) | -0.048<br>(0.619) | 0.082<br>(0.399)  | 0.144<br>(0.136)  | -0.040<br>(0.683)   |
| AAMT | -0.060<br>(0.539)                                 | -0.100<br>(0.304) | 0.090<br>(0.353)  | 0.043<br>(0.661)  | -0.043<br>(0.661) | -0.068<br>(0.485) | 0.143<br>(0.141)  | 0.169<br>(0.080)  | 0.116<br>(0.233)    |
| AAmT | -0.044<br>(0.652)                                 | -0.091<br>(0.348) | 0.066<br>(0.499)  | -0.027<br>(0.784) | 0.000<br>(0.999)  | -0.043<br>(0.656) | 0.039<br>(0.688)  | 0.120<br>(0.215)  | -0.104<br>(0.282)   |
| AMT  | 0.026<br>(0.793)                                  | -0.041<br>(0.673) | 0.052<br>(0.594)  | 0.039<br>(0.691)  | -0.094<br>(0.333) | -0.077<br>(0.428) | 0.033<br>(0.738)  | 0.025<br>(0.799)  | 0.272**<br>(0.004)  |
| AmT  | 0.086<br>(0.376)                                  | -0.037<br>(0.701) | 0.152<br>(0.117)  | 0.075<br>(0.438)  | -0.019<br>(0.848) | -0.110<br>(0.255) | 0.027<br>(0.780)  | 0.131<br>(0.176)  | -0.138<br>(0.153)   |
| TP   | -0.052<br>(0.594)                                 | -0.069<br>(0.481) | -0.009<br>(0.923) | -0.088<br>(0.367) | -0.008<br>(0.934) | -0.085<br>(0.384) | -0.098<br>(0.310) | -0.044<br>(0.653) | -0.283**<br>(0.003) |
| SSH  | -0.048<br>(0.622)                                 | -0.039<br>(0.690) | -0.014<br>(0.885) | -0.035<br>(0.718) | -0.006<br>(0.950) | 0.026<br>(0.793)  | 0.034<br>(0.724)  | 0.045<br>(0.645)  | 0.012<br>(0.904)    |
| ALT  | 0.132<br>(0.173)                                  | 0.119<br>(0.221)  | 0.216*<br>(0.025) | 0.175<br>(0.071)  | 0.176<br>(0.069)  | 0.112<br>(0.247)  | 0.060<br>(0.538)  | 0.131<br>(0.177)  | 0.177<br>(0.068)    |

<sup>a</sup> Correlation coefficient (*r*) written is significantly correlated between the variables compared. Positive values denote positive correlation and negative values denote negative correlation. Values in bracket means *p* value (\*\* *p* < 0.01, \* *p* < 0.05)

**Table S4.** Pearson's correlation coefficient between growth characteristics and marker compounds of *Schisandra chinensis*

|             | Correlation coefficient ( <i>r</i> ) <sup>a</sup> |                     |                    |                     |                   |                   |                    |                     |                     |
|-------------|---------------------------------------------------|---------------------|--------------------|---------------------|-------------------|-------------------|--------------------|---------------------|---------------------|
|             | NFB                                               | LB                  | WB                 | FWB                 | LF                | WF                | FWF                | FW30F               | SG                  |
| Schisandrin | 0.056<br>(0.567)                                  | 0.060<br>(0.537)    | -0.157<br>(0.104)  | -0.066<br>(0.496)   | -0.072<br>(0.457) | -0.050<br>(0.605) | -0.173<br>(0.074)  | -0.157<br>(0.104)   | -0.307**<br>(0.001) |
| Gomisin A   | -0.257**<br>(0.007)                               | -0.266**<br>(0.005) | -0.193*<br>(0.045) | -0.254**<br>(0.008) | -0.076<br>(0.434) | -0.081<br>(0.407) | -0.113<br>(0.246)  | -0.069<br>(0.476)   | -0.293**<br>(0.002) |
| Gomisin N   | 0.105<br>(0.280)                                  | 0.099<br>(0.307)    | -0.074<br>(0.449)  | -0.067<br>(0.489)   | -0.039<br>(0.690) | 0.028<br>(0.770)  | -0.205*<br>(0.033) | -0.291**<br>(0.002) | -0.308**<br>(0.001) |
| Total       | -0.062<br>(0.523)                                 | -0.067<br>(0.491)   | -0.218*<br>(0.024) | -0.199*<br>(0.039)  | -0.095<br>(0.326) | -0.057<br>(0.555) | -0.239*<br>(0.013) | -0.245*<br>(0.011)  | -0.450**<br>(0.000) |

<sup>a</sup> Correlation coefficient (*r*) written is significantly correlated between the variables compared. Positive values denote positive correlation and negative values denote negative correlation. Values in bracket means *p* value (\*\* *p* < 0.01, \* *p* < 0.05).

**Table S5.** Pearson's correlation coefficient between soil physicochemical properties of *Schisandra chinensis* fruit cultivation sites

|      | Correlation coefficient ( <i>r</i> ) <sup>a</sup> |                  |                    |                    |                    |                    |                    |                    |                    |                    |                    |                    |                     |                     |
|------|---------------------------------------------------|------------------|--------------------|--------------------|--------------------|--------------------|--------------------|--------------------|--------------------|--------------------|--------------------|--------------------|---------------------|---------------------|
|      | pH                                                | EC               | OM                 | TN                 | AP                 | K                  | Ca                 | Mg                 | Na                 | CEC                | BS                 | Sand               | Silt                | Clay                |
| pH   | -                                                 | 0.114<br>(0.239) | 0.184<br>(0.057)   | 0.211*<br>(0.028)  | 0.257**<br>(0.007) | 0.367**<br>(0.000) | 0.585**<br>(0.000) | 0.588**<br>(0.000) | 0.077<br>(0.425)   | 0.187<br>(0.052)   | 0.684**<br>(0.000) | 0.234*<br>(0.015)  | -0.063<br>(0.516)   | -0.311**<br>(0.001) |
| EC   |                                                   | -                | 0.624**<br>(0.000) | 0.650**<br>(0.000) | 0.637**<br>(0.000) | 0.672**<br>(0.000) | 0.596**<br>(0.000) | 0.508**<br>(0.000) | 0.488**<br>(0.000) | 0.542**<br>(0.000) | 0.336**<br>(0.000) | 0.010<br>(0.921)   | 0.063<br>(0.514)    | -0.110<br>(0.255)   |
| OM   |                                                   |                  | -                  | 0.981**<br>(0.000) | 0.737**<br>(0.000) | 0.457**<br>(0.000) | 0.744**<br>(0.000) | 0.593**<br>(0.000) | 0.169<br>(0.080)   | 0.855**<br>(0.000) | 0.216*<br>(0.025)  | 0.074<br>(0.449)   | 0.011<br>(0.913)    | -0.143<br>(0.140)   |
| TN   |                                                   |                  |                    | -                  | 0.758**<br>(0.000) | 0.496**<br>(0.000) | 0.770**<br>(0.000) | 0.617**<br>(0.000) | 0.156<br>(0.107)   | 0.862**<br>(0.000) | 0.250**<br>(0.009) | 0.094<br>(0.331)   | 0.009<br>(0.922)    | -0.178<br>(0.066)   |
| AP   |                                                   |                  |                    |                    | -                  | 0.609**<br>(0.000) | 0.725**<br>(0.000) | 0.677**<br>(0.000) | 0.181<br>(0.061)   | 0.607**<br>(0.000) | 0.364**<br>(0.000) | 0.157<br>(0.104)   | -0.047<br>(0.628)   | -0.203*<br>(0.035)  |
| K    |                                                   |                  |                    |                    |                    | -                  | 0.592**<br>(0.000) | 0.667**<br>(0.000) | 0.503**<br>(0.000) | 0.413**<br>(0.000) | 0.497**<br>(0.000) | 0.071<br>(0.462)   | 0.061<br>(0.531)    | -0.214*<br>(0.026)  |
| Ca   |                                                   |                  |                    |                    |                    |                    | -                  | 0.819**<br>(0.000) | 0.209*<br>(0.030)  | 0.679**<br>(0.000) | 0.699**<br>(0.000) | 0.209*<br>(0.030)  | -0.078<br>(0.423)   | -0.247**<br>(0.010) |
| Mg   |                                                   |                  |                    |                    |                    |                    |                    | -                  | 0.218*<br>(0.023)  | 0.491**<br>(0.000) | 0.701**<br>(0.000) | 0.112<br>(0.248)   | -0.041<br>(0.676)   | -0.134<br>(0.167)   |
| Na   |                                                   |                  |                    |                    |                    |                    |                    |                    | -                  | 0.140<br>(0.150)   | 0.276**<br>(0.004) | -0.022<br>(0.820)  | 0.077<br>(0.431)    | -0.075<br>(0.442)   |
| CEC  |                                                   |                  |                    |                    |                    |                    |                    |                    |                    | -                  | 0.047<br>(0.629)   | -0.022<br>(0.818)  | 0.131<br>(0.175)    | -0.155<br>(0.108)   |
| BS   |                                                   |                  |                    |                    |                    |                    |                    |                    |                    |                    | -                  | 0.331**<br>(0.000) | -0.202*<br>(0.036)  | -0.275**<br>(0.004) |
| Sand |                                                   |                  |                    |                    |                    |                    |                    |                    |                    |                    |                    | -                  | -0.817**<br>(0.000) | -0.525**<br>(0.000) |
| Silt |                                                   |                  |                    |                    |                    |                    |                    |                    |                    |                    |                    |                    | -                   | -0.061<br>(0.528)   |
| Clay |                                                   |                  |                    |                    |                    |                    |                    |                    |                    |                    |                    |                    |                     | -                   |

<sup>a</sup> Correlation coefficient (*r*) written is significantly correlated between the variables compared. Positive values denote positive correlation and negative values denote negative correlation. Values in bracket means *p* value (\*\* *p* < 0.01, \* *p* < 0.05).

**Table S6.** Pearson's correlation coefficient between growth characteristics of *Schisandra chinensis* fruit

|       | Correlation coefficient ( <i>r</i> ) <sup>a</sup> |                    |                    |                    |                    |                    |                    |                    |                   |
|-------|---------------------------------------------------|--------------------|--------------------|--------------------|--------------------|--------------------|--------------------|--------------------|-------------------|
|       | NFB                                               | LB                 | WB                 | FWB                | LF                 | WF                 | FWF                | FW30F              | SG                |
| NFB   | -                                                 | 0.651**<br>(0.000) | 0.472**<br>(0.000) | 0.672**<br>(0.000) | 0.243*<br>(0.011)  | 0.222*<br>(0.021)  | 0.088<br>(0.366)   | 0.113<br>(0.243)   | -0.021<br>(0.827) |
| LB    |                                                   | -                  | 0.413**<br>(0.000) | 0.696**<br>(0.000) | 0.437**<br>(0.000) | 0.513**<br>(0.000) | 0.384**<br>(0.000) | 0.357**<br>(0.000) | -0.064<br>(0.508) |
| WB    |                                                   |                    | -                  | 0.732**<br>(0.000) | 0.689**<br>(0.000) | 0.648**<br>(0.000) | 0.584**<br>(0.000) | 0.549**<br>(0.000) | -0.013<br>(0.897) |
| FWB   |                                                   |                    |                    | -                  | 0.557**<br>(0.000) | 0.543**<br>(0.000) | 0.744**<br>(0.000) | 0.689**<br>(0.000) | 0.059<br>(0.542)  |
| LF    |                                                   |                    |                    |                    | -                  | 0.887**<br>(0.000) | 0.591**<br>(0.000) | 0.509**<br>(0.000) | -0.029<br>(0.766) |
| WF    |                                                   |                    |                    |                    |                    | -                  | 0.610**<br>(0.000) | 0.532**<br>(0.000) | -0.100<br>(0.303) |
| FWF   |                                                   |                    |                    |                    |                    |                    | -                  | 0.886**<br>(0.000) | 0.135<br>(0.163)  |
| FW30F |                                                   |                    |                    |                    |                    |                    |                    | -                  | 0.066<br>(0.498)  |
| SG    |                                                   |                    |                    |                    |                    |                    |                    |                    | -                 |

<sup>a</sup> Correlation coefficient (*r*) written is significantly correlated between the variables compared. Positive values denote positive correlation and negative values denote negative correlation. Values in bracket means *p* value (\*\* *p* < 0.01, \* *p* < 0.05).

**Table S7.** Geographic information about the cultivation sites where fruits of *Schisandra chinensis* were collected in South Korea

| Cultivation sites | name of sites   | Altitude | N (latitude) | E (longitude) |
|-------------------|-----------------|----------|--------------|---------------|
|                   |                 | (m)      |              |               |
| 1                 | Wonju-si        | 360      | 37.207500    | 128.080000    |
| 2                 | Inje-gun        | 250      | 37.876111    | 128.281389    |
| 3                 | Taebaek-si      | 470      | 37.261389    | 128.995000    |
| 4                 | Pyeongchang-gun | 566      | 37.412222    | 128.480556    |
| 5                 | Gapyeong-gun    | 381      | 37.814444    | 127.483689    |
| 6                 | Gwangju-si      | 370      | 37.398056    | 127.320556    |
| 7                 | Geochang-gun    | 452      | 35.781111    | 128.008889    |
| 8                 | Sancheong-gun   | 112      | 35.410556    | 127.789722    |
| 9                 | Hamyang-gun     | 146      | 35.539722    | 127.613611    |
| 10                | Gyeongju-si     | 170      | 35.758056    | 128.981389    |
| 11                | Gimcheon-si     | 474      | 35.997222    | 127.926111    |
| 12                | Mungyeong-si 1  | 327      | 36.591389    | 128.011667    |
| 13                | Mungyeong-si 2  | 80       | 36.685833    | 128.253333    |
| 14                | Mungyeong-si 3  | 280      | 36.797500    | 128.219444    |
| 15                | Mungyeong-si 4  | 165      | 36.691389    | 128.253333    |
| 16                | Mungyeong-si 5  | 99       | 36.766667    | 128.364167    |
| 17                | Mungyeong-si 6  | 340      | 36.565472    | 128.263583    |
| 18                | Mungyeong-si 7  | 500      | 36.641111    | 128.217778    |
| 19                | Mungyeong-si 8  | 506      | 36.629444    | 128.058333    |
| 20                | Bonghwa-gun     | 77       | 36.828056    | 129.000278    |
| 21                | Sangju-si       | 360      | 36.590278    | 127.924167    |
| 22                | Yeongyang-gun   | 552      | 36.714167    | 129.102778    |
| 23                | Yeongju-si      | 82       | 36.940833    | 128.653056    |
| 24                | Uiseong-gun     | 756      | 36.496389    | 128.463333    |
| 25                | Namwon-si       | 486      | 35.403889    | 127.529333    |
| 26                | Muju-gun        | 460      | 35.853611    | 127.681667    |
| 27                | Sunchang-gun    | 183      | 35.447194    | 126.915611    |
| 28                | Jangsu-gun 1    | 299      | 35.691139    | 127.490778    |
| 29                | Jangsu-gun 2    | 310      | 35.686389    | 127.621972    |
| 30                | Gongju-si       | 503      | 36.636667    | 126.982778    |
| 31                | Nonsan-si       | 394      | 36.112778    | 127.233333    |
| 32                | Seosan-si       | 226      | 36.835278    | 126.409722    |
| 33                | Cheonan-si      | 112      | 36.749167    | 127.160000    |
| 34                | Boeun-gun       | 171      | 36.433333    | 127.783333    |
| 35                | Cheongju-si     | 93       | 36.603611    | 127.633056    |
| 36                | Chungju-si      | 591      | 36.990000    | 127.808889    |
